# Supplementary material for: Effect of Drought and Methyl Jasmonate Treatment on Primary and Secondary Isoprenoid Metabolites Derived from the MEP Pathway in the White Spruce Picea glauca
Source: MDPI journal article supplement (doi:10.3390/ijms23073838), 2022-03-30
Supplement: s1 [file s1]

## Supplementary Material

| Treatment                 |   |   |   |   |                |   |   |   |   |   |    |    |    |    |                 |
|---------------------------|---|---|---|---|----------------|---|---|---|---|---|----|----|----|----|-----------------|
| Drought time course (day) | 0 | 1 | 2 | 3 | 4              | 5 | 6 | 7 | 8 | 9 | 10 | 11 | 12 | 13 | 14              |
| MeJA time course (day)    |   |   |   |   | 0              | 1 | 2 | 3 | 4 | 5 | 6  | 7  | 8  | 9  | 10              |
|                           |   |   |   |   | First Sampling |   |   |   |   |   |    |    |    |    | Second Sampling |

**Figure S1:** Time course of the experiment. Overall, the experiment took 14 days. Drought was begun at day 0, with MeJA application occurring on day 4. First sampling occurred on day 5 of the drought treatment, one day after MeJA application. The second sampling occurred on the 14th day of the drought treatment, 10 days after MeJA application.

**Table S1:** Effect of application of drought (D) and MeJA (M), separately and combined (D+M), on amounts of monoterpenes emitted ( $\text{ng g}^{-1}\text{DW h}^{-1}$ ) of each compositional group at first and second sampling points. Results are given as mean  $\pm$  SEM. C, control

| First sampling  | Non-oxygenated  | Oxygenated      | Induced         |
|-----------------|-----------------|-----------------|-----------------|
| C               | 1052 $\pm$ 516  | 180 $\pm$ 94    | 6 $\pm$ 3       |
| D               | 763 $\pm$ 167   | 586 $\pm$ 231   | 9 $\pm$ 3       |
| M               | 6051 $\pm$ 2389 | 2571 $\pm$ 609  | 5787 $\pm$ 1077 |
| DM              | 1532 $\pm$ 372  | 2249 $\pm$ 1043 | 875 $\pm$ 284   |
| Second sampling | Non-oxygenated  | Oxygenated      | Induced         |
| C               | 195 $\pm$ 46    | 25 $\pm$ 13     | 19 $\pm$ 2      |
| D               | 559 $\pm$ 241   | 112 $\pm$ 58    | 24 $\pm$ 7      |
| M               | 4774 $\pm$ 3410 | 1979 $\pm$ 1523 | 160 $\pm$ 68    |
| DM              | 1281 $\pm$ 326  | 278 $\pm$ 70    | 40 $\pm$ 10     |

**Table S2:** List of qRT-PCR primers used in this study. Primer sequences are listed from 5'→3' with F for forward and R for the reverse primer.

| PRIMER    | SEQUENCES                |
|-----------|--------------------------|
| DXS 1F    | AAGGGAGCACGAGGTAATAATAAC |
| DXS 1R    | CGATGTAGTGGTCAGGAAGAAC   |
| DXS 2A-1F | GTTGACAGTGGAGGAAGG       |
| DXS 2A-1R | ATTATGGTAGCCGCAATATG     |
| DXS 2B-1F | TGGTTGTAATGGCTCCTTC      |
| DXS 2B-1R | GGGTTCCCTTTGTTGTTTGG     |
| DXR-F     | ATCTTGCTTATTCTGCTGGTAG   |
| DXR-R     | TGGTCATAGTGTATTATCTCTTCC |
| UBI-F     | GTTGATTTTTGCTGGCAAGC     |
| UBI-R     | CACCTCTCAGACGAAGTAC      |
